# Supplementary material for: Exome and copy number variation analyses of Mayer–Rokitansky–Küster– Hauser syndrome
Source: PubMed Central journal article supplement (PMC6160444; doi:10.1038/s41439-018-0028-4), 2018-09-27
Supplement: 41439_2018_28_MOESM1_ESM.pdf [file 41439_2018_28_MOESM1_ESM.pdf]

**Table S1.** Clinical information of 10 patients.

| Patient | Family/Sporadic | Phenotype | Genital                                             | Renal               | Skeleton                   | Heart        | Hearing                |
|---------|-----------------|-----------|-----------------------------------------------------|---------------------|----------------------------|--------------|------------------------|
| A1      | Sporadic        | Type I    | Rudimentary uterus (bilateral),<br>Vaginal agenesis | Normal              | Normal                     | Normal       | Normal                 |
| A2      | Sporadic        | Type II   | Rudimentary uterus,<br>Vaginal agenesis             | Normal              | Scoliosis                  | Normal       | Normal                 |
| A3      | Sporadic        | Type I    | Rudimentary uterus (bilateral),<br>Vaginal agenesis | Normal              | Normal                     | Normal       | Normal                 |
| A4      | Sporadic        | Type I    | Rudimentary uterus (bilateral),<br>Vaginal agenesis | Normal              | Normal                     | Normal       | Normal                 |
| A5      | Trio            | Type I    | Rudimentary uterus (Rt.),<br>Vaginal agenesis       | Normal              | Normal                     | Normal       | Normal                 |
| A6      | quartet         | Type I    | Rudimentary uterus (bilateral),<br>Vaginal agenesis | Normal              | Normal                     | Normal       | Normal                 |
| A7      | Trio            | Type II   | Rudimentary uterus (bilateral),<br>Vaginal agenesis | Lt. kidney agenesis | Normal                     | Normal       | Normal                 |
| A8      | Sporadic        | Type II   | Rudimentary uterus,<br>Vaginal agenesis             | Normal              | Scoliosis,<br>Funnel chest | Brady cardia | Rt. hearing impairment |
| A9      | Sporadic        | Type I    | Rudimentary uterus (bilateral),<br>Vaginal agenesis | Normal              | Normal                     | Normal       | Normal                 |
| A10     | Sporadic        | Type II   | Rudimentary uterus (bilateral),<br>Vaginal agenesis | Normal              | Scoliosis                  | Normal       | Normal                 |

Genital, genital system aplasia; Renal, renal system aplasia; Skeleton, skeletal malformations; Heart, cardiac anomalies; Hearing, hearing defects.
