# Supplementary material for: Exome and copy number variation analyses of Mayer–Rokitansky–Küster– Hauser syndrome
Source: PubMed Central journal article supplement (PMC6160444; doi:10.1038/s41439-018-0028-4), 2018-09-27
Supplement: 41439_2018_28_MOESM6_ESM.pdf [file 41439_2018_28_MOESM6_ESM.pdf]

**Table S5.** De novo variants found in the three MRKH syndrome families.

| Patient | Position       | Gene          | NCBI accession | cDNA change | Protein change | HGDV | iJGVD |
|---------|----------------|---------------|----------------|-------------|----------------|------|-------|
| A5      | chr13:77661732 | <i>MYCBP2</i> | NM_015057      | c.A10762G   | p.T3588A       | NA   | NA    |
| A6      | chr12:78400834 | <i>NAV3</i>   | NM_001024383   | c.A1516G    | p.I506V        | NA   | NA    |
| A7      | chr9:112182816 | <i>PTPN3</i>  | NM_002829      | c.A1201C    | p.N401H        | NA   | NA    |

cDNA changes and protein changes were annotated based on nucleotide database (NCBI accession) and chromosomal position (hg19) using ANNOVAR. All the variants were novel variants in the two public database of Japanese (HGVD and iJGVD). NA, Not applicable.
